# Supplementary material for: CaMK1D signalling in AgRP neurons promotes ghrelin-mediated food intake
Source: Springer Nature journal article supplement (doi:10.1038/s42255-023-00814-x), 2023-06-05

# Source Data Fig. 6a Uncropped Images all proteins phostag gels

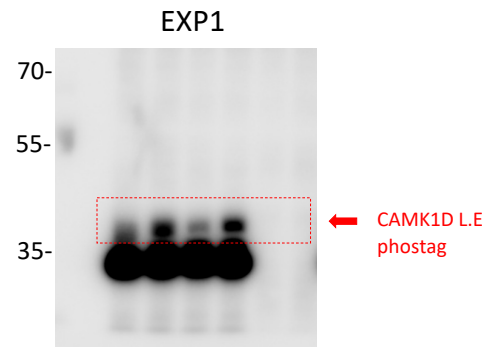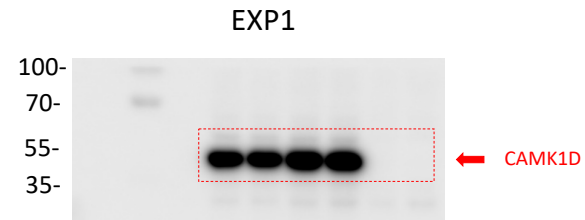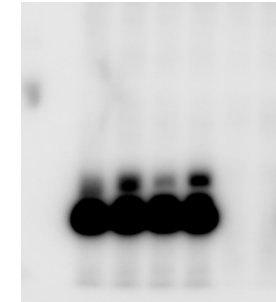

Corresponding to Figure

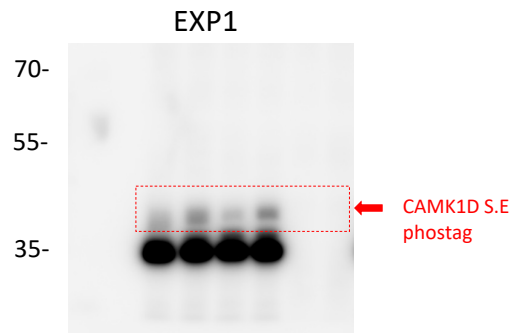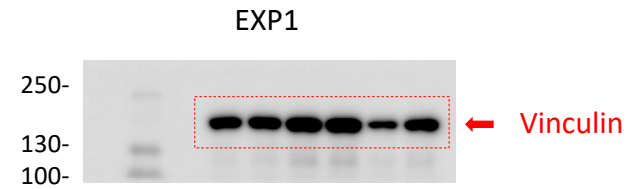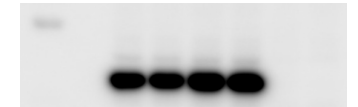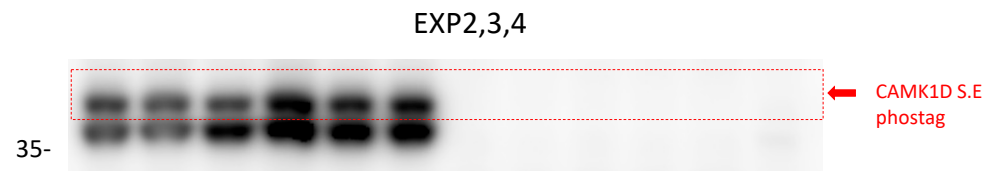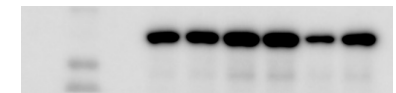

# Source Data Fig. 6b Uncropped Images all proteins

Corresponding to Figure

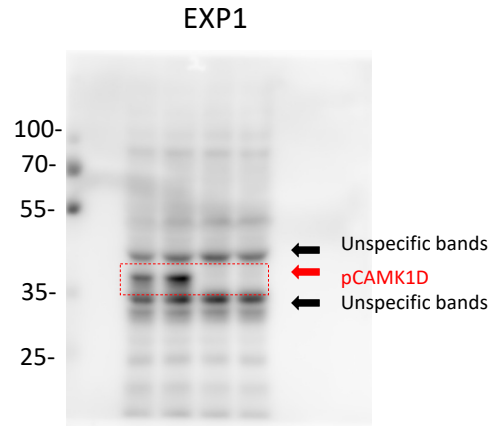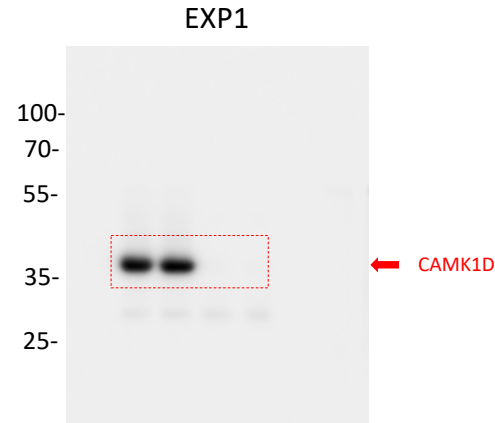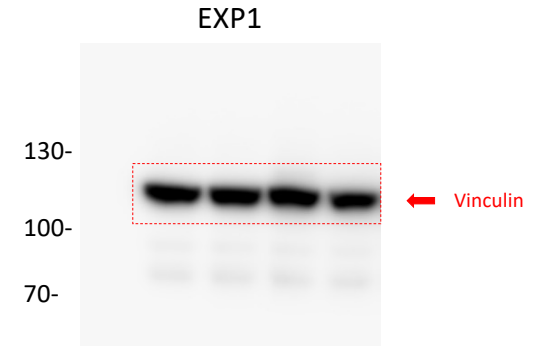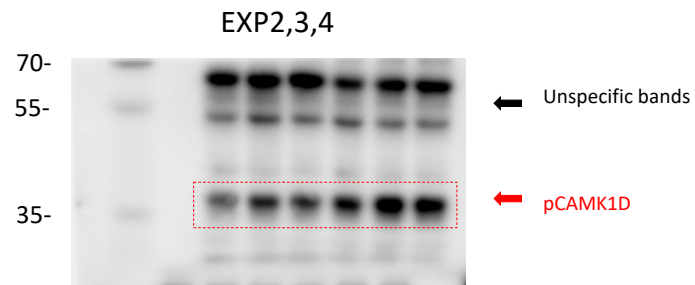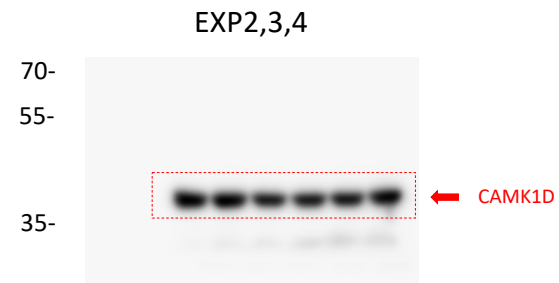

# Source Data Fig. 6d Uncropped Images ACC and pACC

Corresponding to Figure

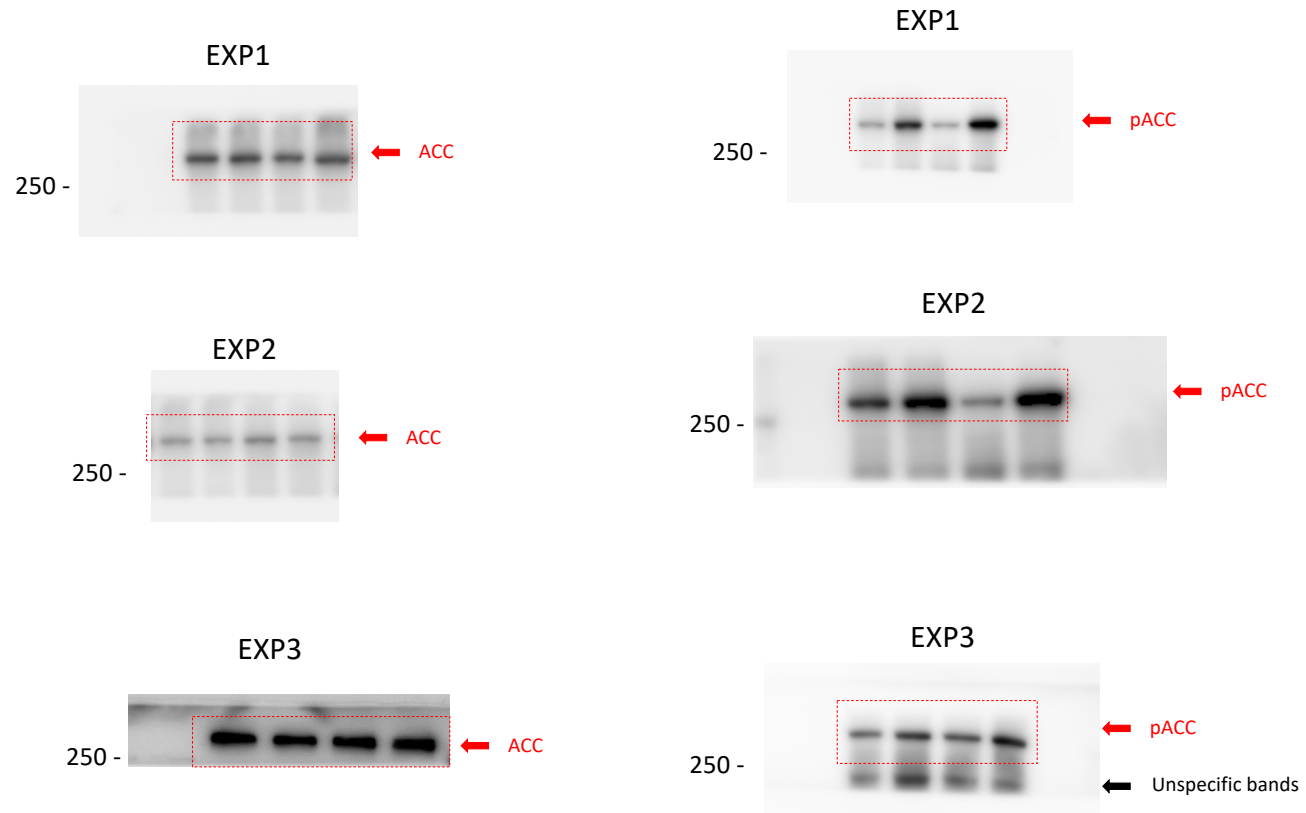

# Source Data Fig. 6d Uncropped Images AMPK and pAMPK

Corresponding to Figure

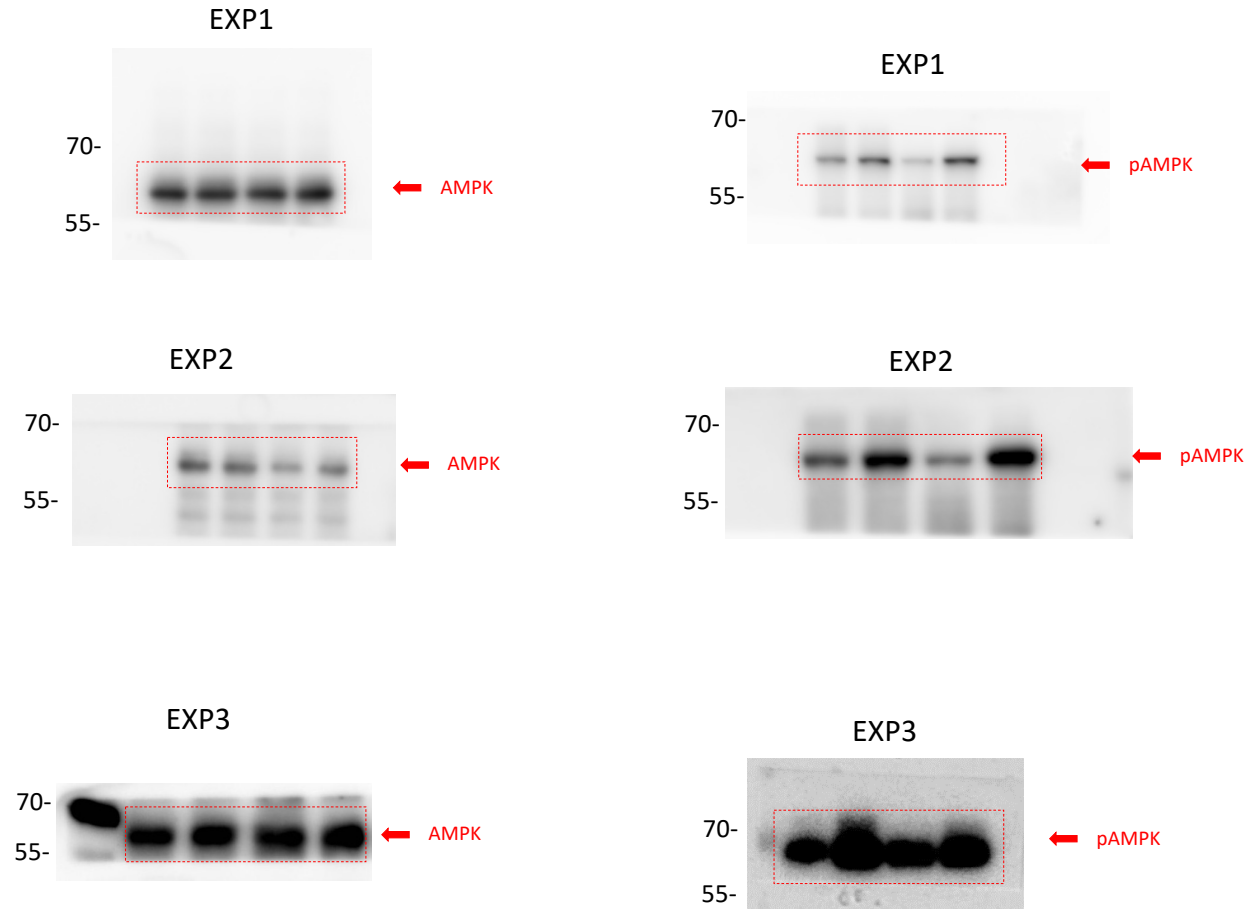

## Source Data Fig. 6d Uncropped Images CAMK1D

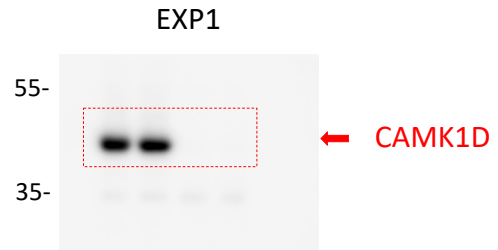

Corresponding to Figure

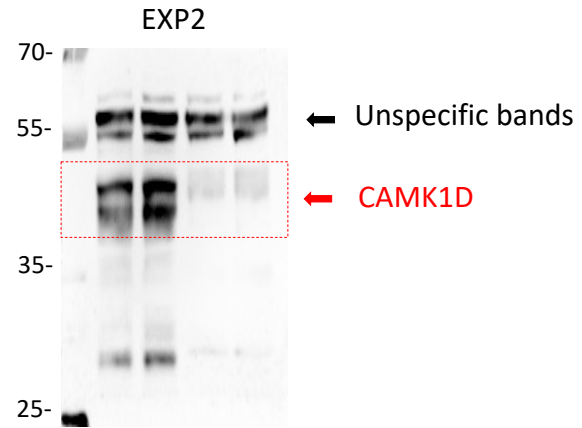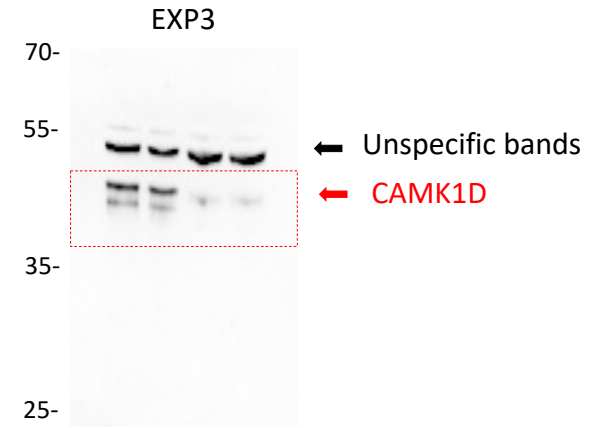

# Source Data 6d Uncropped Images GAPDH

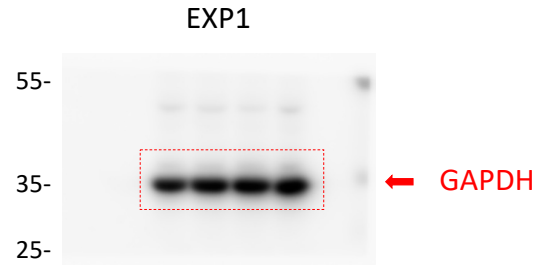

Corresponding to Figure

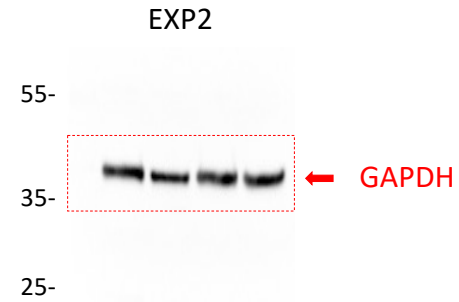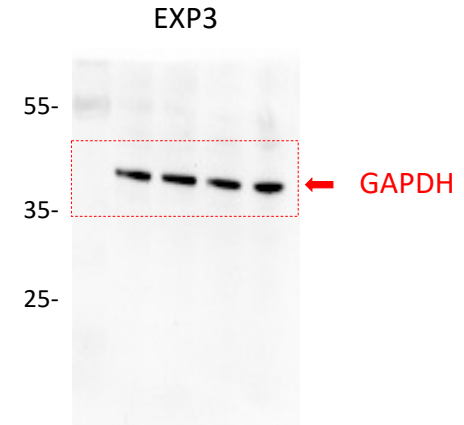

Fig. 6g Source Data

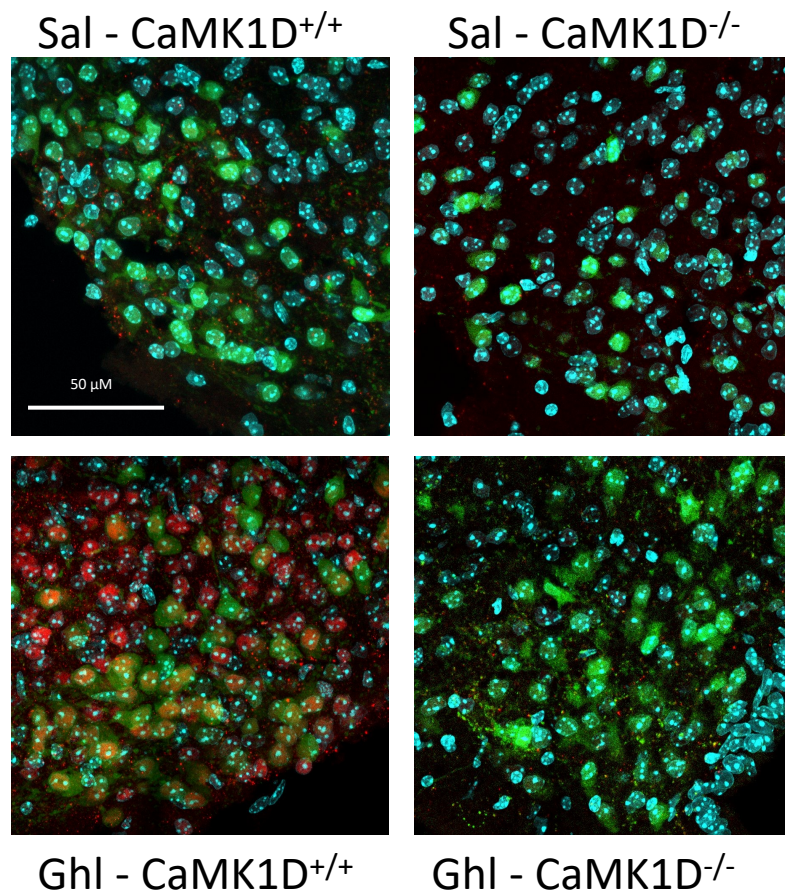

Fig. 6j Source Data

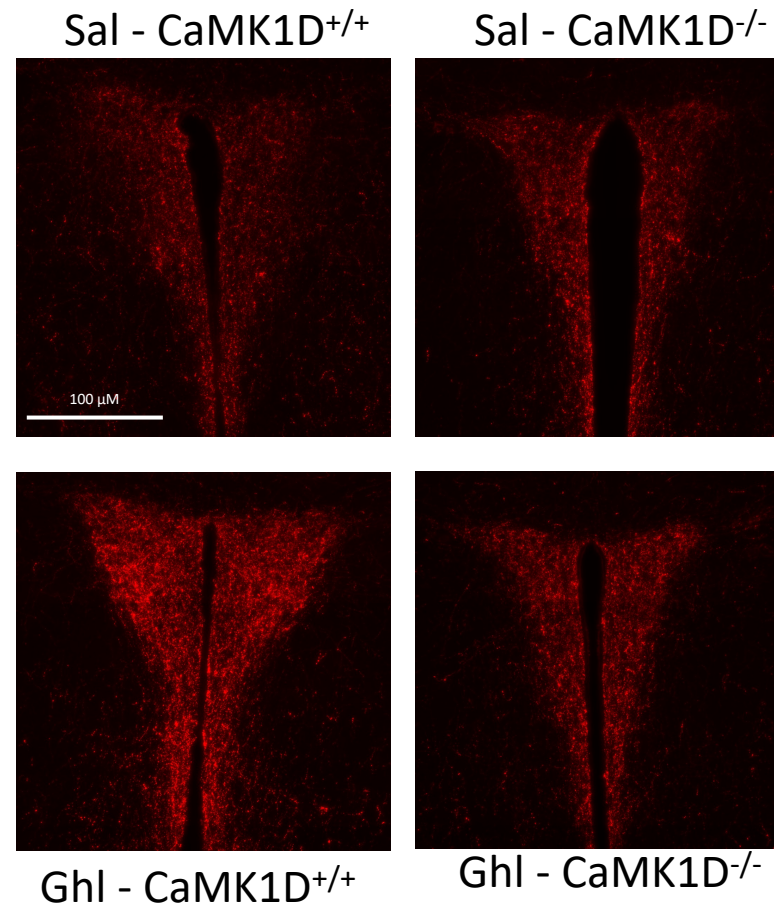



Fig. 6i Source Data

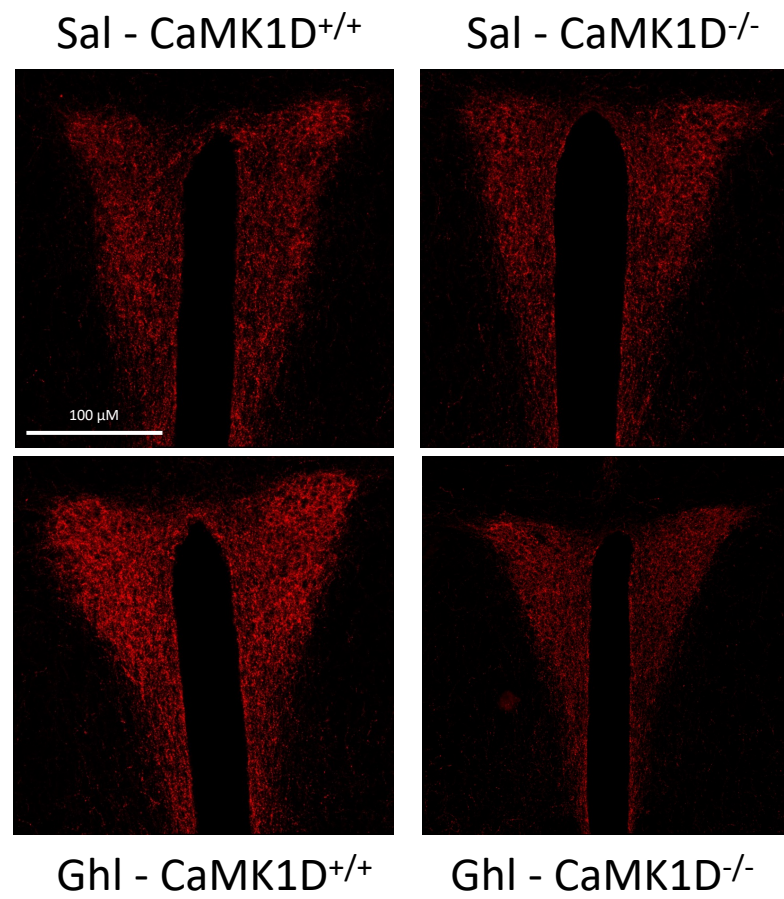

Supplement: 42255_2023_814_MOESM11_ESM.pdf [file 42255_2023_814_MOESM11_ESM.pdf]
