# Supplementary material for: CaMK1D signalling in AgRP neurons promotes ghrelin-mediated food intake
Source: Springer Nature journal article supplement (doi:10.1038/s42255-023-00814-x), 2023-06-05

# Source Data Extended Data 4a Uncropped Images all proteins

### Brain

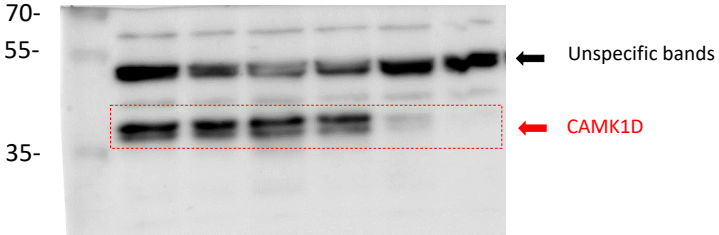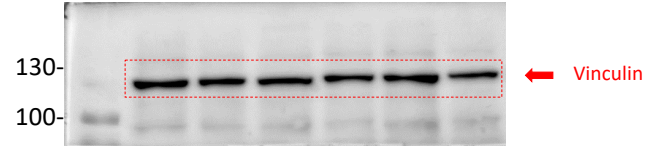

### Hypothalamus

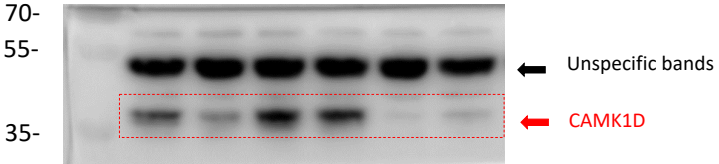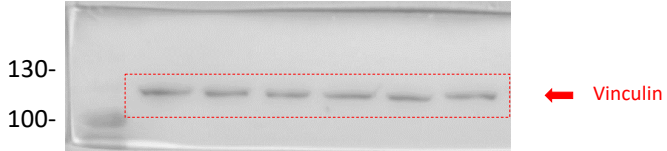

### Intestine

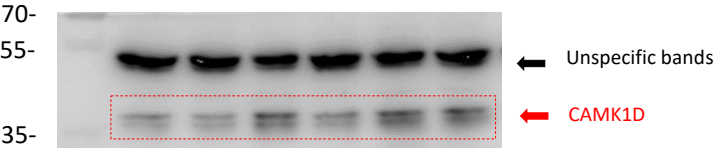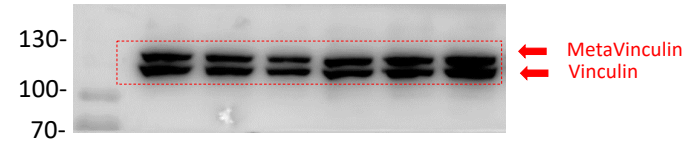

### Pancreas

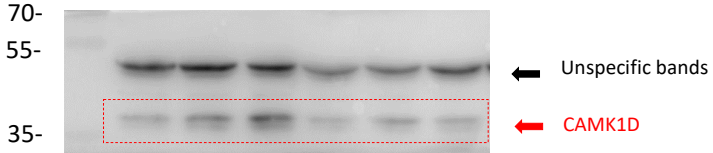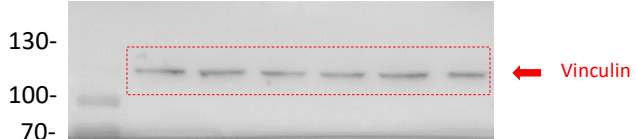

Supplement: 42255_2023_814_MOESM17_ESM.pdf [file 42255_2023_814_MOESM17_ESM.pdf]
