# Supplementary figures and images for: CaMK1D signalling in AgRP neurons promotes ghrelin-mediated food intake
Source: Springer Nature journal article supplement (doi:10.1038/s42255-023-00814-x), 2023-06-05

# Extended Data 2C Uncropped Images all proteins

Brain

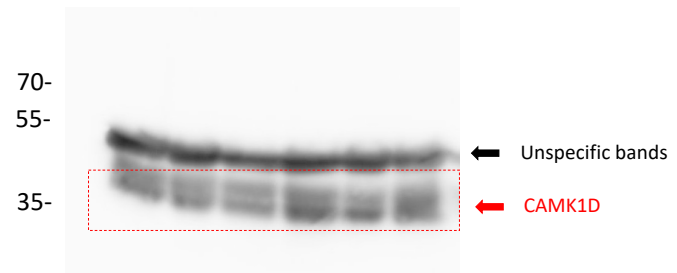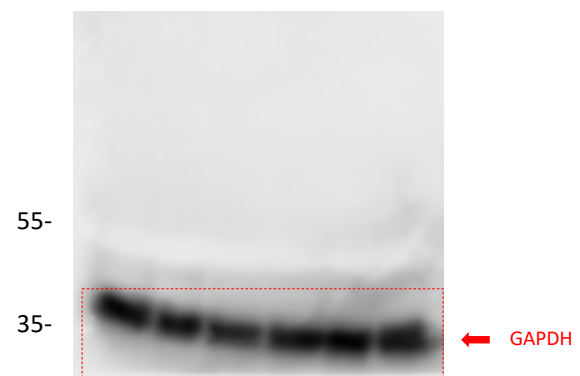

Pancreas

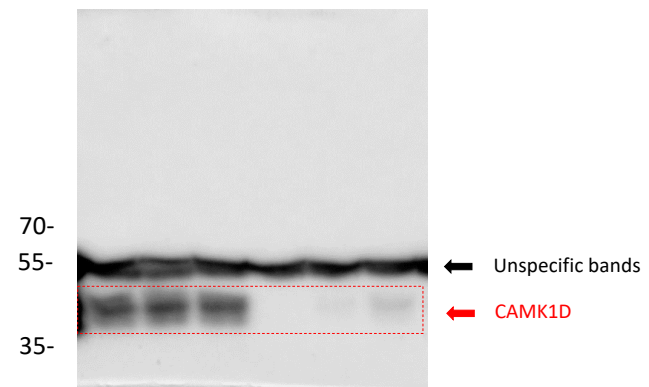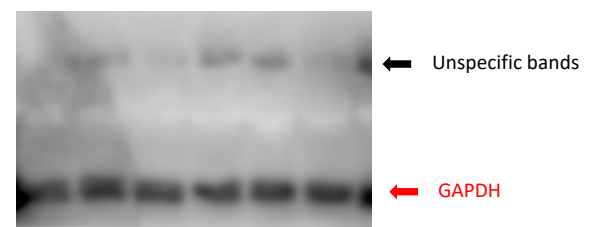

Supplement: 42255_2023_814_MOESM14_ESM.pdf [file 42255_2023_814_MOESM14_ESM.pdf]

# Source Data Fig. 1a Uncropped Images all proteins

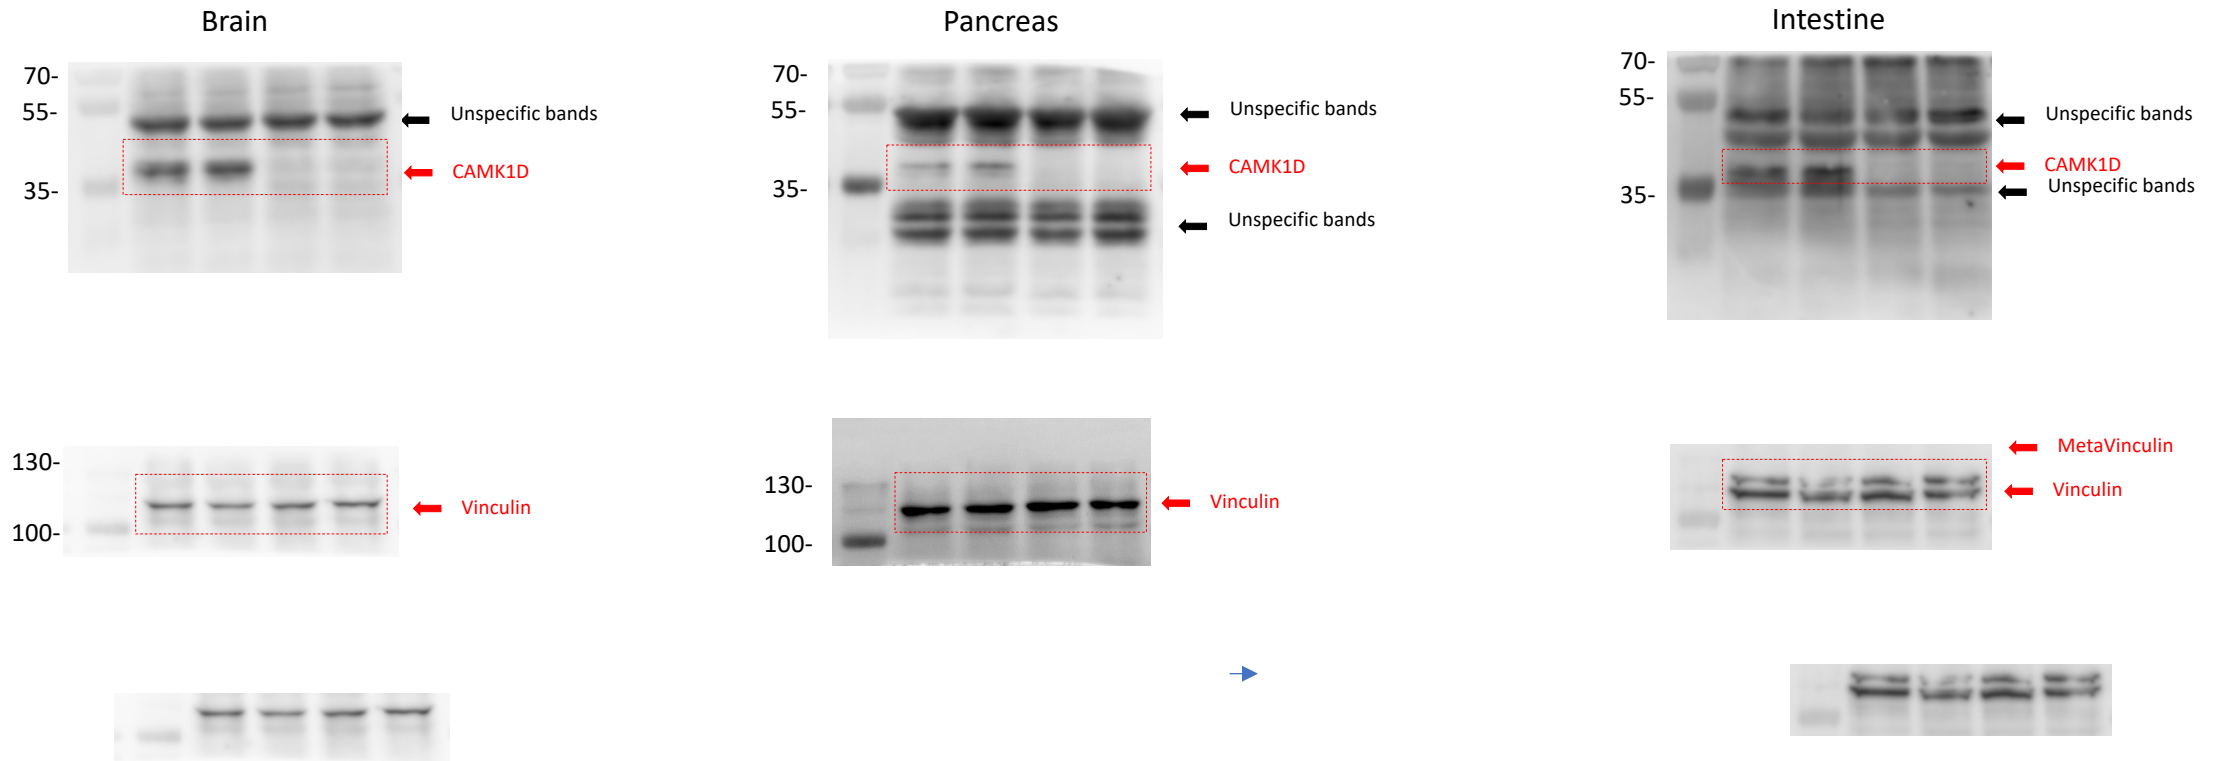

Supplement: 42255_2023_814_MOESM3_ESM.pdf [file 42255_2023_814_MOESM3_ESM.pdf]

# Source Data Fig. 3f

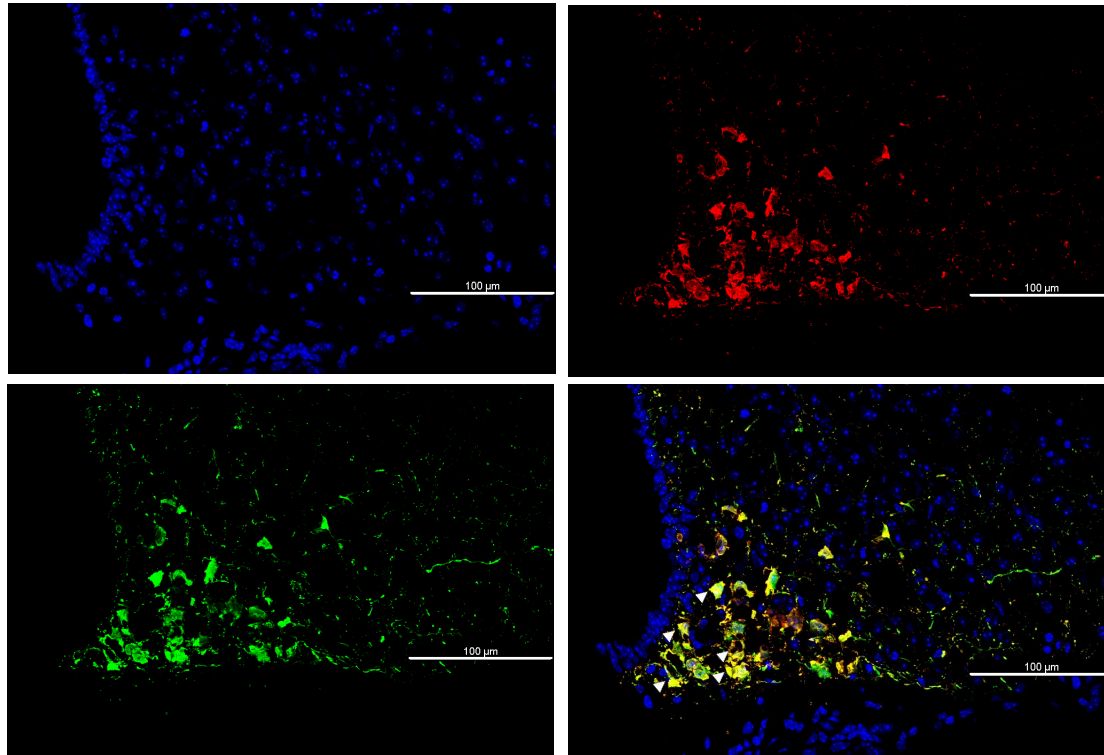

Source Data Fig. 3h

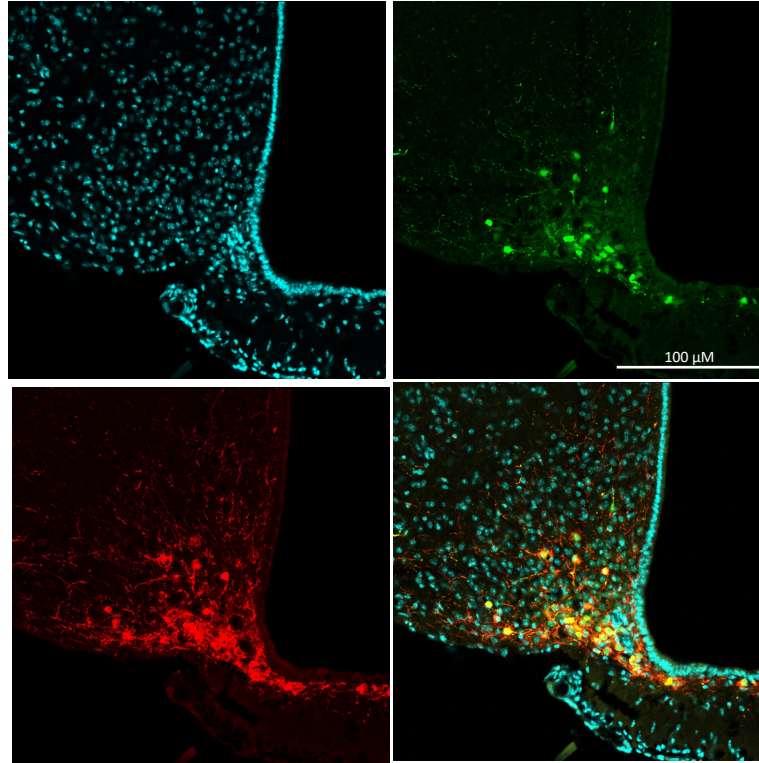

Source Data Fig. 3i

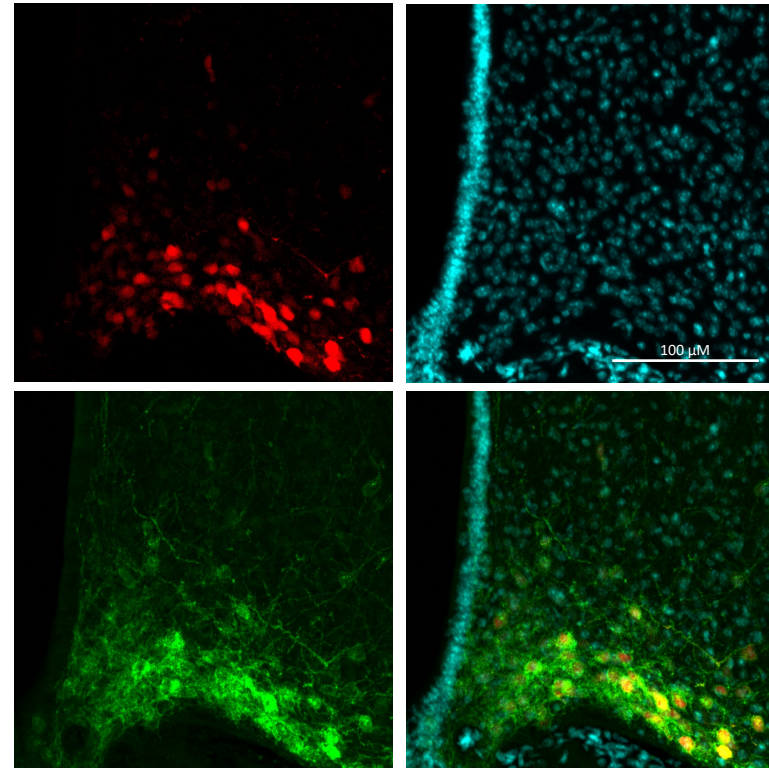

Supplement: 42255_2023_814_MOESM6_ESM.pdf [file 42255_2023_814_MOESM6_ESM.pdf]

Source Data Fig. 5a

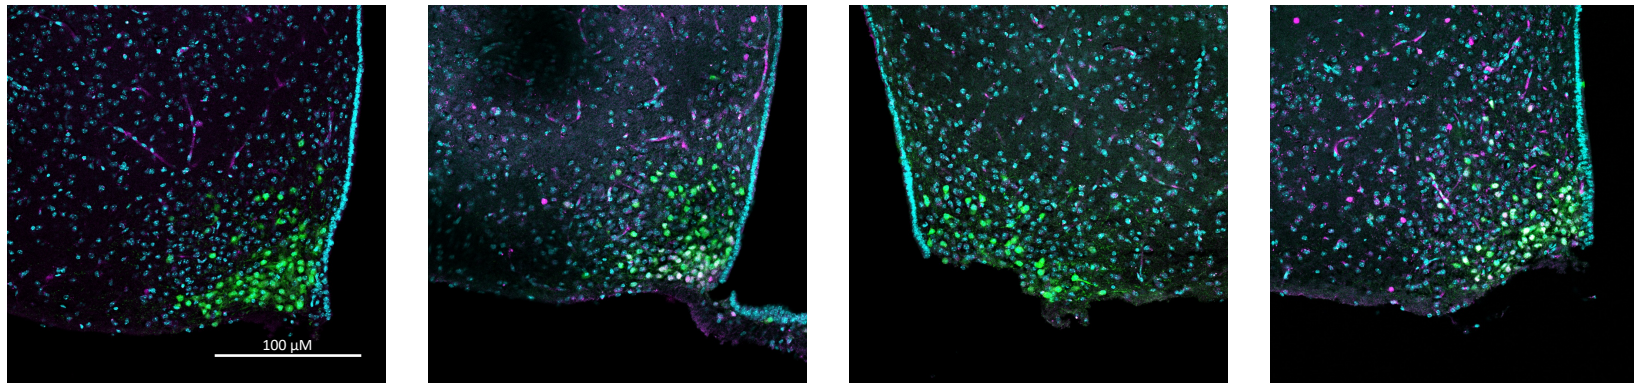

Source Data Fig. 5c

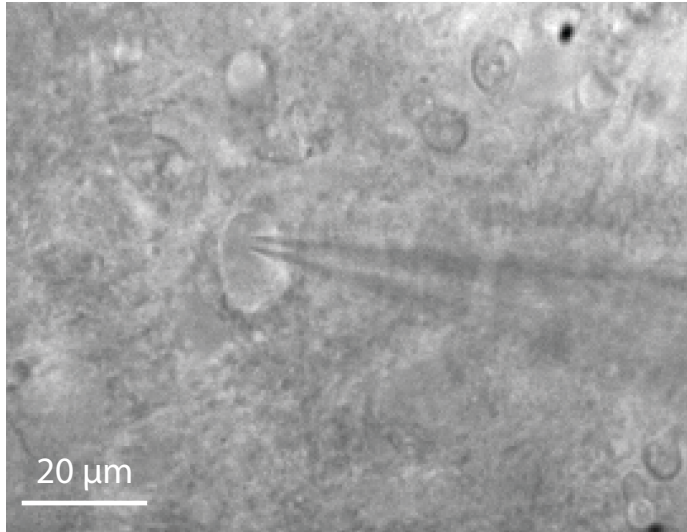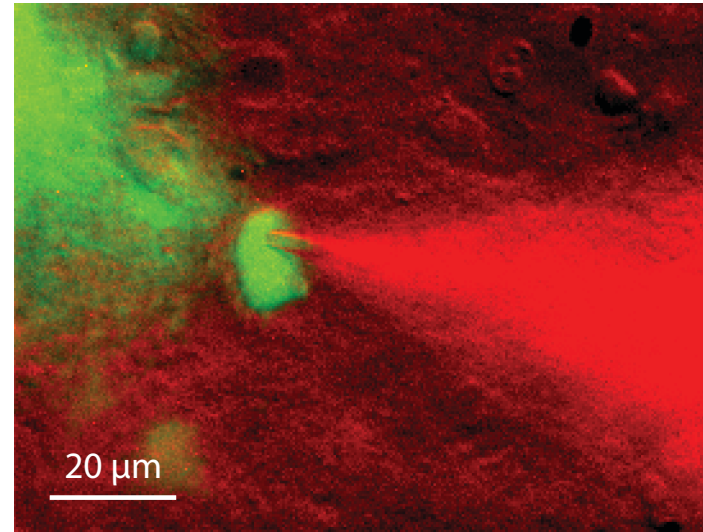

Supplement: 42255_2023_814_MOESM9_ESM.pdf [file 42255_2023_814_MOESM9_ESM.pdf]
